# Supplementary material
Source: Springer Nature journal article supplement (https://www.springermedizin.de/resource/supplementary/12865_2013_546_MOESM5_ESM.pdf/9428182)

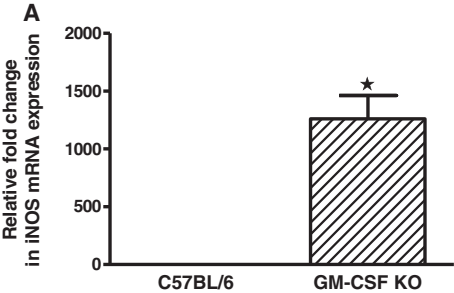

★  $p = <0.0001$ ,  $n=5$

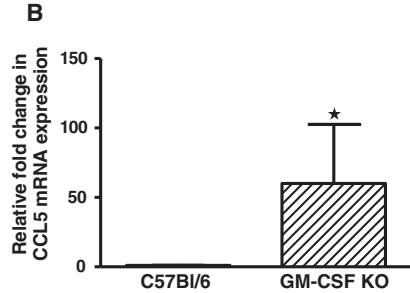

★  $p = 0.0002$ ,  $n \geq 3$

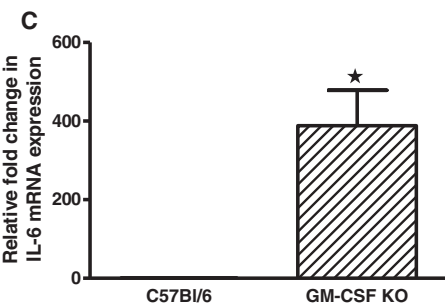

★  $p = 0.003$ ,  $n \geq 3$

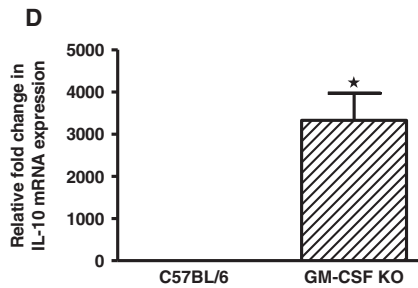

★  $p = 0.005$ ,  $n=3$

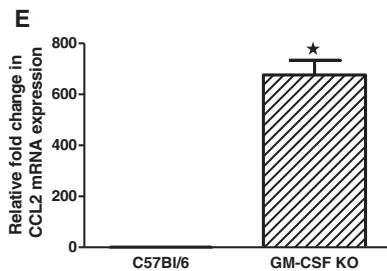

★  $p = <0.0001$ ,  $n \geq 3$

Supplement: MOESM5 [file 9428182]
